# Supplementary material for: Providing food to patients in primary care to induce weight loss: a systematic literature review
Source: HighWire-hosted journal article supplement (doi:10.1136/bmjnph-2020-000195), 2021-03-26
Supplement: bmjnph-2020-000195supp001_data_supplement.pdf [file bmjnph-2020-000195supp001_data_supplement.pdf]

### Appendix 1. Complete Search from Each Database

The following electronic databases were searched: CINAHL, MEDLINE, Embase, SCOPUS. Boolean connectors AND were used to combine three search categories related to (i) food provision, (ii) primary care and (iii) weight management. Boolean connectors OR were used to combine search terms within each category. MESH terms or subject headings were used in coordination with each database's rules. Proximity searching was conducted for search terms where possible.

**Table X.** Summary of search terms and results for each database with MESH terms highlighted in red text

| Database               | Search Terms Used                                                                                                                                                                                                                                                                                                                                                                                                                                                                                                                                                                                                                                                                                                                                                                                                                                       | Results |
|------------------------|---------------------------------------------------------------------------------------------------------------------------------------------------------------------------------------------------------------------------------------------------------------------------------------------------------------------------------------------------------------------------------------------------------------------------------------------------------------------------------------------------------------------------------------------------------------------------------------------------------------------------------------------------------------------------------------------------------------------------------------------------------------------------------------------------------------------------------------------------------|---------|
| Embase<br>(all fields) | (Emtree: 'food intake'/exp OR 'dietary intake'/exp OR 'diet supplementation'/exp) OR ("medical food" OR "food prescri*" OR "food provis*" OR "food provide*" OR "meal prescri*" OR "meal provis*" OR "meal provide*" OR "diet prescri*" OR "diet* provis*" OR "diet* provide*" OR "nutri* prescri*" OR "nutri* provis*" OR "nutri* provide*" OR "oral nutri* supplement*") OR ((food* OR meal* OR diet* OR nutriti*) NEAR/3 (prescri* OR provis*)) <b>AND</b><br>(Emtree: 'primary health care'/exp OR 'general practice'/exp) OR ("primary care" OR "primary health care" OR "family practi*" OR "family care" OR "family physician" OR "general pract*" OR "community care" OR "health cent*") <b>AND</b><br>(Emtree: 'weight'/exp OR 'body weight'/exp OR 'body weight change'/exp) OR weight* OR malnutrition OR obes* OR overweight OR underweight | 7,912   |
| CINAHL                 | (MH "Food Intake") OR (MH "Dietary Supplements") OR (MH "Food") OR ("medical food" OR "food prescri*" OR "food provis*" OR "food provide*" OR "meal prescri*" OR "meal provis*" OR "meal provide*" OR "diet prescri*" OR "diet* provis*" OR "diet* provide*" OR "nutri* prescri*" OR "nutri* provis*" OR "nutri* provide*" OR "oral nutri* supplement*") OR ((food* OR meal* OR diet* OR nutriti*) N3 (prescri* OR provis*)) <b>AND</b><br>(MH "primary health care") OR (MH "family practice") OR ("primary care" OR "primary health care" OR "family practi*" OR "family care" OR "family physician" OR "general pract*" OR "community care" OR "health cent*") <b>AND</b><br>(MH "Body Weight Changes") OR (MH "Body Weight") OR weight* OR malnutrition OR obes* OR overweight OR underweight                                                       | 286     |
| Medline                | (MH "Eating") OR (MH "Food") OR (MH "Dietary Supplements") OR ("medical food" OR "food prescri*" OR "food provis*" OR "food provide*" OR "meal prescri*" OR "meal provis*" OR "meal provide*" OR "diet prescri*" OR "diet* provis*" OR "diet* provide*" OR "nutri* prescri*" OR "nutri* provis*" OR "nutri* provide*" OR "oral nutri* supplement*") OR ((food* OR meal* OR diet* OR nutriti*) N3 (prescri* OR provis*)) <b>AND</b><br>(MH "primary health care") OR (MH "family practice") OR ("primary care" OR "primary health care" OR "family practi*" OR "family care" OR "family physician" OR "general pract*" OR "community care" OR "health cent*") <b>AND</b>                                                                                                                                                                                 | 816     |

|                                                                                     |                                                                                                                                                                                                                                                                                                                                                                                                                                                                                                                                                                                                                   |              |
|-------------------------------------------------------------------------------------|-------------------------------------------------------------------------------------------------------------------------------------------------------------------------------------------------------------------------------------------------------------------------------------------------------------------------------------------------------------------------------------------------------------------------------------------------------------------------------------------------------------------------------------------------------------------------------------------------------------------|--------------|
|                                                                                     | (MH "Body Weight Changes") OR (MH "Body Weight") OR weight* OR malnutrition OR obes* OR overweight OR underweight                                                                                                                                                                                                                                                                                                                                                                                                                                                                                                 |              |
| Scopus<br>(searched<br>within title,<br>abstract,<br>keywords)<br>*no MESH<br>terms | ("medical food" OR "food prescri*" OR "food provis*" OR "food provide*" OR "meal prescri*" OR "meal provis*" OR "meal provide*" OR "diet prescri*" OR "diet* provis*" OR "diet* provide*" OR "nutri* prescri*" OR "nutri* provis*" OR "nutri* provide*" OR "oral nutri* supplement*") OR ((food* OR meal* OR diet* OR nutriti*) W/3 (prescri* OR provis*)) <b>AND</b><br>"primary care" OR "primary health care" OR "family practi*" OR "family care" OR "family physician" OR "general pract*" OR "community care" OR "health cent*" <b>AND</b><br>weight* OR malnutrition OR obes* OR overweight OR underweight | 120          |
| <b>TOTAL (before duplicates removed)</b>                                            |                                                                                                                                                                                                                                                                                                                                                                                                                                                                                                                                                                                                                   | <b>9,134</b> |
